# Supplementary material for: The Novel Link between Gene Expression Profiles of Adult T-Cell Leukemia/Lymphoma Patients’ Peripheral Blood Lymphocytes and Ferroptosis Susceptibility
Source: MDPI journal article supplement (doi:10.3390/genes14112005), 2023-10-27

Supplement Figure 1: The enrichment pathway analysis of ferroptosis-related DEGs

A

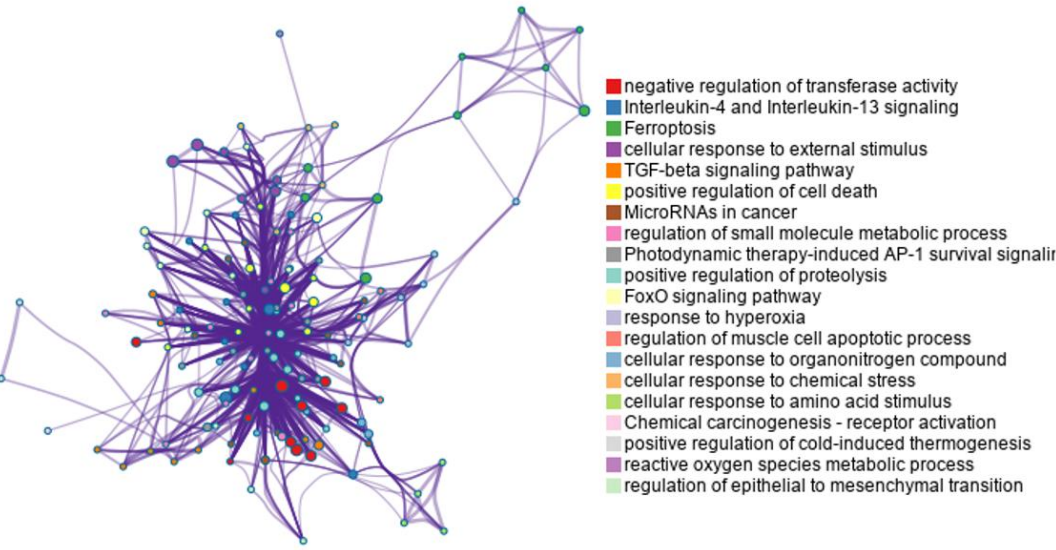

B

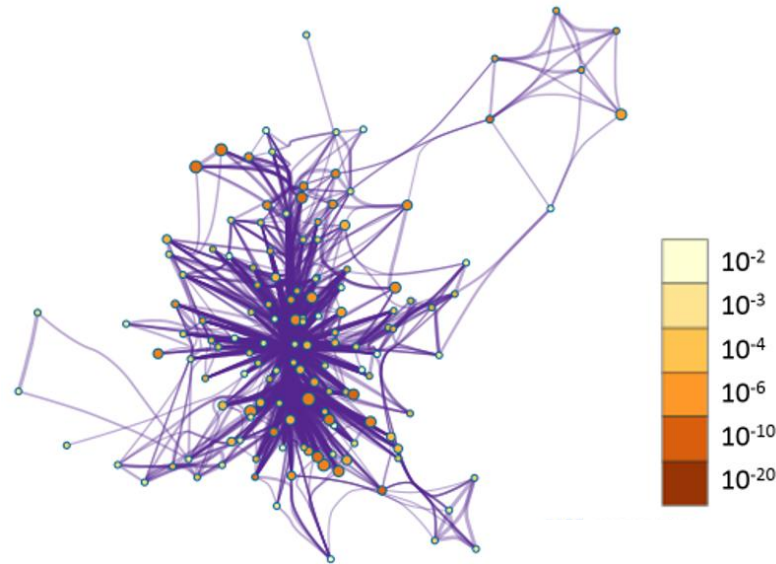

Supplementary Figure 2: The enrichment pathway analysis of autophagy-related DEGs

A

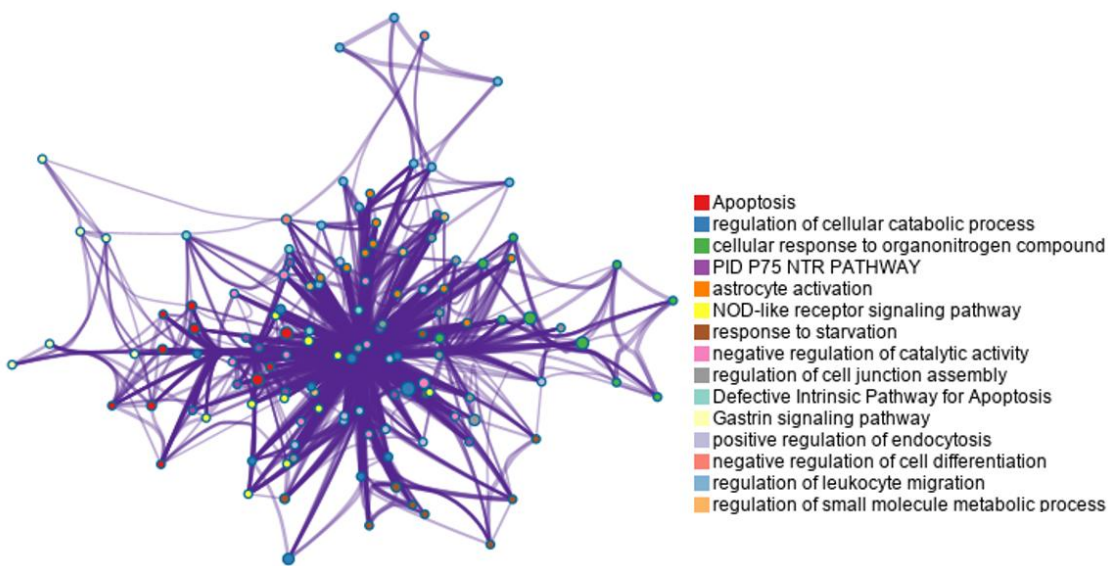

B

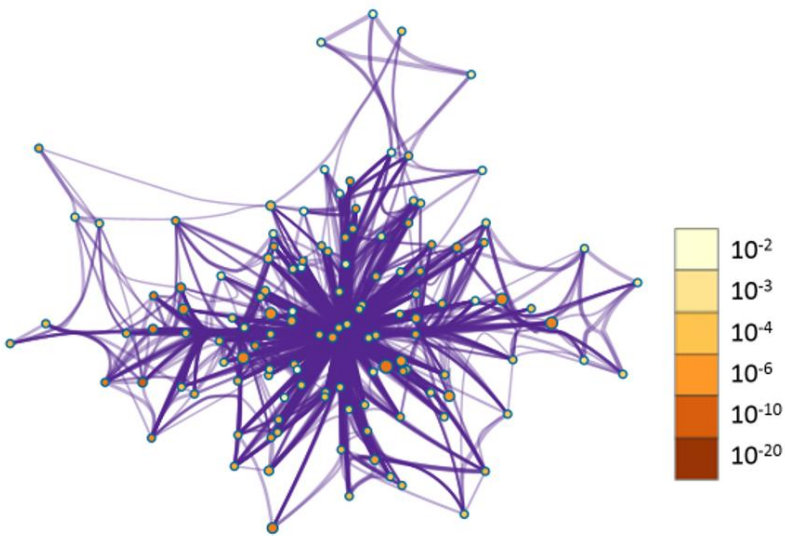

### Supplementary Figure 3 The network of Target genes- TF and -miRNA

A

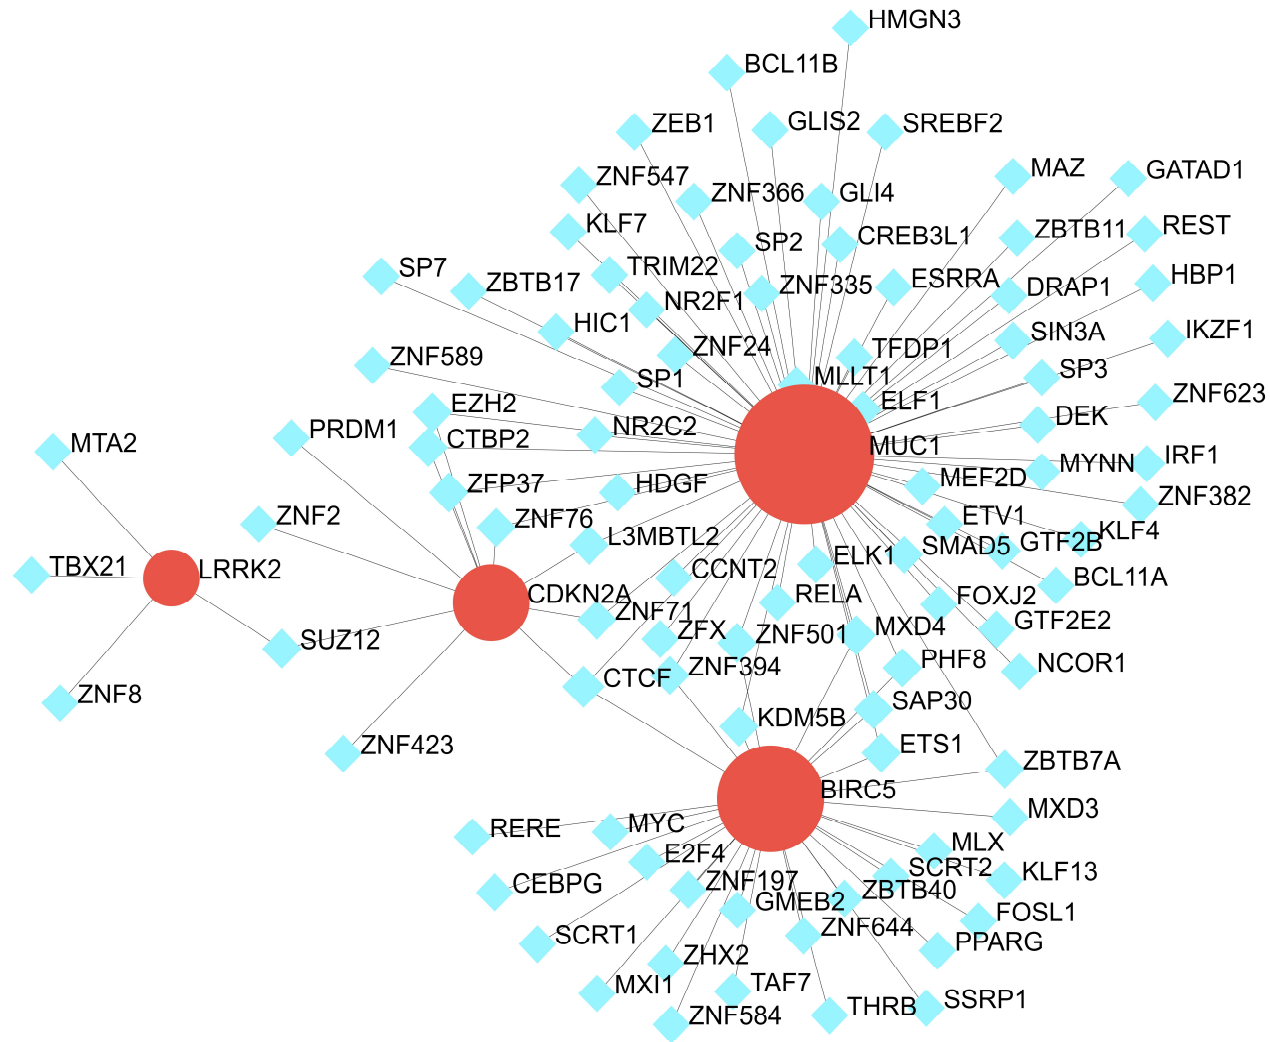

B

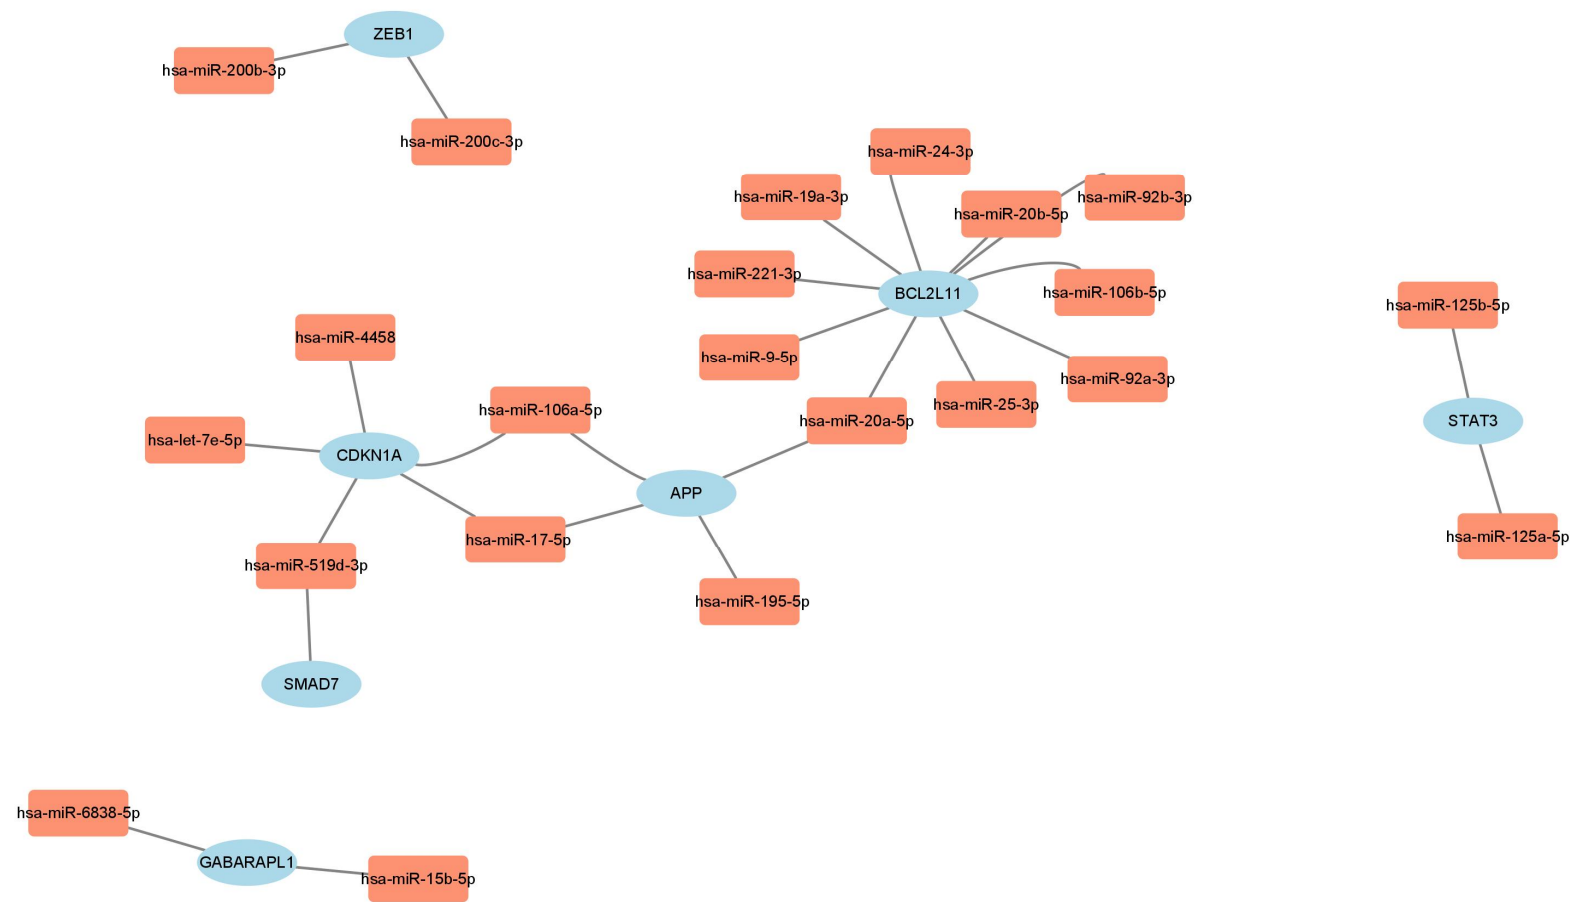

Supplement: s1 [file s1]
