# Supplementary material for: The Novel Link between Gene Expression Profiles of Adult T-Cell Leukemia/Lymphoma Patients’ Peripheral Blood Lymphocytes and Ferroptosis Susceptibility
Source: MDPI journal article supplement (doi:10.3390/genes14112005), 2023-10-27
Supplement: s1 [file s1]

Supplementary Table S1. Ferroptosis-related differentially expressed genes of ATL.

| genesymbol | adj.P.Val | logFC   | Gene Title                                                                             | id    |
|------------|-----------|---------|----------------------------------------------------------------------------------------|-------|
| HBA1       | 1.29E-18  | 6.4372  | hemoglobin, alpha 1                                                                    | 35676 |
| NEDD4L     | 2.16E-07  | 3.2987  | neural precursor cell expressed,<br>developmentally down-regulated 4-like"             | 16818 |
| TP63       | 5.12E-05  | 2.5939  | tumor protein p63                                                                      | 28920 |
| VLDLR      | 6.82E-07  | 2.5599  | very low density lipoprotein receptor                                                  | 7516  |
| TF         | 1.89E-14  | 2.4631  | transferrin                                                                            | 792   |
| WWTR1      | 1.37E-07  | 2.1082  | WW domain containing transcription<br>regulator 1                                      | 12258 |
| CAV1       | 2.23E-03  | 2.0759  | caveolin 1, caveolae protein, 22kDa"                                                   | 33242 |
| CREB5      | 5.15E-06  | 2.0431  | cAMP responsive element binding protein<br>5                                           | 35433 |
| RRM2       | 1.96E-04  | 1.9609  | ribonucleotide reductase M2 polypeptide                                                | 21855 |
| GPT2       | 4.76E-05  | 1.8667  | glutamic pyruvate transaminase (alanine<br>aminotransferase) 2                         | 39644 |
| CDC25A     | 7.30E-05  | 1.8540  | cell division cycle 25 homolog A (S.<br>pombe)                                         | 1097  |
| CAPG       | 9.41E-09  | 1.8137  | capping protein (actin filament),<br>gelsolin-like"                                    | 18229 |
| MGST1      | 3.56E-04  | 1.6725  | microsomal glutathione S-transferase 1                                                 | 6390  |
| PEX6       | 3.70E-08  | 1.6342  | peroxisomal biogenesis factor 6                                                        | 9186  |
| CDKN2A     | 1.06E-05  | 1.5771  | cyclin-dependent kinase inhibitor 2A<br>(melanoma, p16, inhibits CDK4)"                | 1687  |
| TRIB2      | 5.89E-07  | 1.5699  | tribbles homolog 2 (Drosophila)                                                        | 22976 |
| MAPKAP1    | 1.40E-13  | 1.5590  | mitogen-activated protein kinase<br>associated protein 1                               | 24217 |
| MT1G       | 3.01E-06  | 1.5454  | metallothionein 1G                                                                     | 22896 |
| PDK4       | 2.52E-03  | 1.5406  | pyruvate dehydrogenase kinase, isozyme<br>4"                                           | 42318 |
| MUC1       | 4.65E-06  | 1.5266  | mucin 1, cell surface associated"                                                      | 28892 |
| STEAP3     | 7.89E-05  | 1.5105  | STEAP family member 3                                                                  | 6929  |
| MAPK8      | 8.19E-09  | -1.5254 | mitogen-activated protein kinase 8                                                     | 30035 |
| SLC7A5     | 4.83E-06  | -1.5717 | solute carrier family 7 (cationic amino<br>acid transporter, y+ system), member 5"     | 2090  |
| SCD        | 2.41E-07  | -1.6331 | stearoyl-CoA desaturase<br>(delta-9-desaturase)                                        | 41666 |
| PARP11     | 5.61E-10  | -1.6501 | poly (ADP-ribose) polymerase family,<br>member 11"                                     | 26888 |
| STAT3      | 1.38E-09  | -1.7027 | signal transducer and activator of<br>transcription 3 (acute-phase response<br>factor) | 27157 |
| SLC7A11    | 5.83E-08  | -1.7518 | solute carrier family 7, (cationic amino                                               | 32586 |

|            |          |         |                                                                                          |       |
|------------|----------|---------|------------------------------------------------------------------------------------------|-------|
|            |          |         | acid transporter, y <sup>+</sup> system) member 11"                                      |       |
| ZFP36      | 2.06E-11 | -1.7783 | zinc finger protein 36, C3H type, homolog (mouse)"                                       | 2800  |
| ZEB1       | 3.64E-07 | -1.8059 | zinc finger E-box binding homeobox 1                                                     | 18088 |
| AKR1C3     | 3.02E-04 | -1.8111 | aldo-keto reductase family 1, member C3 (3-alpha hydroxysteroid dehydrogenase, type II)" | 42774 |
| BNIP3      | 1.14E-10 | -1.8593 | BCL2/adenovirus E1B 19kDa interacting protein 3                                          | 29331 |
| IFNG       | 2.08E-04 | -1.8867 | interferon, gamma"                                                                       | 16569 |
| LGMN       | 3.06E-05 | -1.9617 | legumain                                                                                 | 39661 |
| GABARAP L1 | 6.59E-09 | -1.9746 | GABA(A) receptor-associated protein like 1                                               | 6174  |
| SOCS1      | 3.54E-12 | -2.0723 | suppressor of cytokine signaling 1                                                       | 41081 |
| SETD1B     | 3.29E-19 | -2.1030 | SET domain containing 1B                                                                 | 39229 |
| RBMS1      | 1.85E-14 | -2.1612 | RNA binding motif, single stranded interacting protein 1"                                | 11523 |
| ENPP2      | 6.20E-06 | -2.1921 | ectonucleotide pyrophosphatase/phosphodiesterase 2                                       | 24072 |
| DPP4       | 1.48E-14 | -2.3504 | dipeptidyl-peptidase 4                                                                   | 12264 |
| USP35      | 6.58E-28 | -2.4351 | ubiquitin specific peptidase 35                                                          | 19531 |
| CDKN1A     | 2.48E-15 | -2.5308 | cyclin-dependent kinase inhibitor 1A (p21, Cip1)"                                        | 15513 |
| SLC40A1    | 3.51E-08 | -2.7593 | solute carrier family 40 (iron-regulated transporter), member 1"                         | 19903 |
| LCN2       | 6.04E-07 | -2.7757 | lipocalin 2                                                                              | 33122 |
| IL1B       | 3.82E-06 | -2.7949 | interleukin 1, beta"                                                                     | 17980 |
| BEX1       | 3.17E-14 | -3.6296 | brain expressed, X-linked 1                                                              | 38982 |
| SMAD7      | 3.03E-16 | -3.9545 | SMAD family member 7                                                                     | 351   |

---

Supplementary Table S2. The ferroptosis-related differentially expressed genes were divided into ferroptosis suppressor, driver, unclassified and marker

| suppressor | driver    | unclassified | marker  |
|------------|-----------|--------------|---------|
| BEX1       | SMAD7     | HBA1         | SLC40A1 |
| NEDD4L     | IL1B      | VLDLR        | TF      |
| LCN2       | TF        | TF           |         |
| SLC40A1    | DPP4      | SETD1B       |         |
| TP63       | WWTR1     | RRM2         |         |
| CDKN1A     | SOCS1     | GPT2         |         |
| TF         | GABARAPL1 | BNIP3        |         |
| USP35      | LGMN      | CAPG         |         |
| ENPP2      | IFNG      | SLC7A11      |         |
| RBMS1      | ZEB1      | SLC7A5       |         |
| CAV1       | SLC7A11   | STEAP3       |         |
| CREB5      | PEX6      |              |         |
| RRM2       | CDKN2A    |              |         |
| CDC25A     | MAPK8     |              |         |
| AKR1C3     |           |              |         |
| ZFP36      |           |              |         |
| SLC7A11    |           |              |         |
| STAT3      |           |              |         |
| MGST1      |           |              |         |
| PARP11     |           |              |         |
| SCD        |           |              |         |
| TRIB2      |           |              |         |
| MAPKAP1    |           |              |         |
| MT1G       |           |              |         |
| PDK4       |           |              |         |
| MUC1       |           |              |         |

Supplementary Table S3. Autophagy-related differentially expressed genes of ATL.

| genesymbol | adj.P.Val   | logFC   | Gene Title                                                           | id    |
|------------|-------------|---------|----------------------------------------------------------------------|-------|
| TP63       | 5.12344E-05 | 2.5939  | tumor protein p63                                                    | 28920 |
| LRRK2      | 4.87445E-06 | 2.2772  | leucine-rich repeat kinase 2                                         | 20217 |
| TP53INP1   | 1.04677E-11 | 1.9438  | tumor protein p53 inducible nuclear protein 1                        | 36711 |
| CYB5A      | 3.37088E-05 | 1.7382  | cytochrome b5 type A (microsomal)                                    | 44466 |
| UBASH3B    | 1.38957E-07 | 1.5932  | ubiquitin associated and SH3 domain containing, B                    | 36160 |
| TBC1D5     | 3.43742E-11 | 1.5848  | TBC1 domain family, member 5"                                        | 39178 |
| CDKN2A     | 1.06318E-05 | 1.5771  | cyclin-dependent kinase inhibitor 2A (melanoma, p16, inhibits CDK4)" | 1687  |
| PDK4       | 0.002524317 | 1.5406  | pyruvate dehydrogenase kinase, isozyme 4"                            | 42318 |
| BIRC5      | 0.002498051 | 1.5288  | baculoviral IAP repeat-containing 5                                  | 28938 |
| MAPK8      | 8.18775E-09 | -1.5254 | mitogen-activated protein kinase 8                                   | 30035 |
| EEF2K      | 3.30867E-08 | -1.5688 | eukaryotic elongation factor-2 kinase                                | 21439 |
| GPR18      | 1.63242E-07 | -1.7436 | G protein-coupled receptor 18                                        | 28002 |
| SNAI1      | 3.09973E-07 | -1.7720 | snail homolog 1 (Drosophila)                                         | 1390  |
| BIRC2      | 9.04297E-27 | -1.9537 | baculoviral IAP repeat-containing 2                                  | 17712 |
| GABARAPL1  | 6.5943E-09  | -1.9746 | GABA(A) receptor-associated protein like 1                           | 6174  |
| TNF        | 1.95885E-06 | -2.0012 | tumor necrosis factor (TNF superfamily, member 2)"                   | 13025 |
| APP        | 2.62527E-06 | -2.0422 | amyloid beta (A4) precursor protein                                  | 20175 |
| SIK2       | 1.14839E-11 | -2.3187 | salt-inducible kinase 2                                              | 15147 |
| MAPT       | 2.0207E-14  | -2.5343 | microtubule-associated protein tau                                   | 20433 |
| BCL2L11    | 1.94785E-10 | -2.5709 | BCL2-like 11 (apoptosis facilitator)                                 | 32463 |
| LZTS1      | 1.30016E-12 | -3.0211 | leucine zipper, putative tumor suppressor 1"                         | 32127 |
| LAPTM4B    | 2.64801E-13 | -3.2081 | lysosomal protein transmembrane 4 beta                               | 22671 |
| CAMP       | 1.13546E-06 | -3.3231 | cathelicidin antimicrobial peptide                                   | 26579 |
| TBC1D4     | 9.798E-15   | -3.8369 | TBC1 domain family, member 4                                         | 4777  |
| CXCR3      | 2.57717E-19 | -3.8766 | chemokine (C-X-C motif) receptor 3                                   | 23155 |
| MID2       | 3.32244E-19 | -4.3439 | midline 2                                                            | 23728 |

Supplementary Table S4. GO/KEGG enrichment analysis for Ferroptosis-related

| Ontology | ID         | Description                                                         | p.adjust    | Count | zscore       |
|----------|------------|---------------------------------------------------------------------|-------------|-------|--------------|
| BP       | GO:0051348 | negative regulation of transferase activity                         | 2.42636E-05 | 9     | -0.333333333 |
|          |            | cellular response to external stimulus                              | 0.001053878 | 7     | -1.889822365 |
|          | GO:0071496 | cellular response to chemical stress                                | 0.001518472 | 7     | -0.377964473 |
|          |            | negative regulation of phosphorylation                              | 2.42636E-05 | 10    | -0.632455532 |
|          | GO:0042326 | regulation of epithelial cell differentiation                       | 4.16383E-05 | 7     | -0.377964473 |
|          |            | negative regulation of protein phosphorylation                      | 4.16383E-05 | 9     | -0.333333333 |
|          | GO:0001933 | response to metal ion                                               | 4.5611E-05  | 9     | -0.333333333 |
|          | GO:0010038 | iron ion transport                                                  | 8.5108E-05  | 5     | -0.447213595 |
|          | GO:0050863 | regulation of T cell activation                                     | 0.001598328 | 7     | -1.889822365 |
|          | GO:0006826 | apical part of cell                                                 | 0.064255189 | 6     | -0.816496581 |
| CC       | GO:0045177 | protein kinase inhibitor activity                                   | 0.002977318 | 4     | 0            |
|          |            | kinase inhibitor activity                                           | 0.002977318 | 4     | 0            |
|          |            | iron ion binding                                                    | 0.002977318 | 5     | 0.447213595  |
|          |            | ferric iron binding                                                 | 0.017642478 | 2     | 1.414213562  |
| MF       | GO:0008199 | cyclin-dependent protein serine/threonine kinase inhibitor activity | 0.017642478 | 2     | 0            |
|          |            | RNA polymerase II-specific DNA-binding transcription factor binding | 0.053844353 | 5     | -0.447213595 |
|          | GO:0061629 | Ferroptosis                                                         | 0.007337061 | 4     | 0            |
|          | GO:004216  | FoxO signaling pathway                                              | 0.017693871 | 5     | -2.236067977 |
| KEGG     | hsa04068   | MicroRNAs in cancer                                                 | 0.017693871 | 7     | -0.377964473 |
|          | hsa04115   | p53 signaling pathway                                               | 0.017693871 | 4     | 1            |
|          | hsa05212   | Pancreatic cancer                                                   | 0.017693871 | 4     | -1           |
|          | hsa05418   | Fluid shear stress and atherosclerosis                              | 0.017693871 | 5     | -0.447213595 |
|          |            | IL-17 signaling pathway                                             | 0.023030109 | 4     | -2           |
|          | hsa04657   | Th17 cell differentiation                                           | 0.029027441 | 4     | -2           |
|          | hsa04659   | HIF-1 signaling pathway                                             | 0.029027441 | 4     | -1           |
|          | hsa04066   | Human T-cell leukemia virus 1 infection                             | 0.041852069 | 5     | -0.447213595 |
|          |            |                                                                     |             |       |              |
|          | hsa05166   |                                                                     |             |       |              |

Supplementary Table S5. GO/KEGG enrichment analysis for Autophagy-related

| ONTOLOGY | ID         | Description                     | p.adjust    | Count | zscore       |
|----------|------------|---------------------------------|-------------|-------|--------------|
| BP       | GO:0042594 | response to starvation          | 0.000158625 | 6     | 0            |
| BP       | GO:0048143 | astrocyte activation            | 0.000480446 | 3     | -1.732050808 |
|          |            | positive regulation of cellular |             |       |              |
| BP       | GO:0031331 | catabolic process               | 0.001812582 | 6     | -0.816496581 |
| BP       | GO:0010506 | regulation of autophagy         | 0.000158625 | 7     | -1.133893419 |
|          |            | regulation of cysteine-type     |             |       |              |
|          |            | endopeptidase activity          |             |       |              |
| BP       | GO:0043281 | involved in apoptotic process   | 0.000158625 | 6     | -0.816496581 |
| BP       | GO:1901653 | cellular response to peptide    | 0.000158625 | 7     | -1.889822365 |
| BP       | GO:0001774 | microglial cell activation      | 0.000158625 | 4     | -1           |
|          |            | regulation of cysteine-type     |             |       |              |
| BP       | GO:2000116 | endopeptidase activity          | 0.000158625 | 6     | -0.816496581 |
|          |            | leukocyte activation involved   |             |       |              |
| BP       | GO:0002269 | in inflammatory response        | 0.000158625 | 4     | -1           |
| MF       | GO:0015631 | tubulin binding                 | 9.10484E-05 | 7     | -1.133893419 |
| MF       | GO:0008017 | microtubule binding             | 0.00012198  | 6     | -0.816496581 |
| MF       | GO:0004857 | enzyme inhibitor activity       | 0.008716538 | 5     | 0.447213595  |
|          |            | cysteine-type endopeptidase     |             |       |              |
|          |            | inhibitor activity involved in  |             |       |              |
| MF       | GO:0043027 | apoptotic process               | 0.012089896 | 2     | 0            |
| MF       | GO:0051087 | chaperone binding               | 0.012089896 | 3     | -0.577350269 |
|          |            | cysteine-type endopeptidase     |             |       |              |
|          |            | regulator activity involved in  |             |       |              |
| MF       | GO:0043028 | apoptotic process               | 0.033290429 | 2     | 0            |
| CC       | GO:0005776 | autophagosome                   | 0.001729195 | 4     | 1            |
| CC       | GO:0045121 | membrane raft                   | 0.0018998   | 5     | -1.341640786 |
| CC       | GO:0098857 | membrane microdomain            | 0.0018998   | 5     | -1.341640786 |
| KEGG     | hsa04210   | Apoptosis                       | 0.000775323 | 5     | -1.341640786 |
|          |            | NOD-like receptor signaling     |             |       |              |
| KEGG     | hsa04621   | pathway                         | 0.002229251 | 5     | -2.236067977 |
| KEGG     | hsa04215   | Apoptosis - multiple species    | 9.76225E-05 | 4     | -1           |
| KEGG     | hsa01524   | Platinum drug resistance        | 0.020240912 | 3     | 0.577350269  |
| KEGG     | hsa05210   | Colorectal cancer               | 0.026139473 | 3     | -0.577350269 |
| KEGG     | hsa04931   | Insulin resistance              | 0.03501896  | 3     | -1.732050808 |
| KEGG     | hsa04668   | TNF signaling pathway           | 0.03501896  | 3     | -1.732050808 |
| KEGG     | hsa05145   | Toxoplasmosis                   | 0.03501896  | 3     | -1.732050808 |
| KEGG     | hsa04068   | FoxO signaling pathway          | 0.048627811 | 3     | -1.732050808 |

Supplementary Table S6. GO/KEGG enrichment analysis for Hub genes of Ferroptosis- and Autophagy-related DEGs.

| ONTOLOGY | ID         | Description                      | p.adjust    | Count | zscore       |
|----------|------------|----------------------------------|-------------|-------|--------------|
| BP       | GO:0061900 | glial cell activation            | 1.17856E-08 | 6     | -1.632993162 |
|          |            | positive regulation of           |             |       |              |
| BP       | GO:0045862 | proteolysis                      | 1.17856E-08 | 9     | -2.333333333 |
| BP       | GO:0150076 | neuroinflammatory response       | 2.2193E-08  | 6     | -1.632993162 |
|          |            | negative regulation of           |             |       |              |
| BP       | GO:0045936 | phosphate metabolic process      | 2.2193E-08  | 9     | -1.666666667 |
| BP       | GO:0048143 | astrocyte activation             | 1.17856E-08 | 5     | -2.236067977 |
|          |            | leukocyte activation involved in |             |       |              |
| BP       | GO:0002269 | inflammatory response            | 1.72726E-07 | 5     | -1.341640786 |
|          |            | negative regulation of           |             |       |              |
| BP       | GO:0042326 | phosphorylation                  | 1.72726E-07 | 8     | -1.414213562 |
|          |            | positive regulation of           |             |       |              |
| BP       | GO:0032755 | interleukin-6 production         | 3.67117E-06 | 5     | -2.236067977 |
| CC       | GO:0045121 | membrane raft                    | 0.000544419 | 5     | -1.341640786 |
| CC       | GO:0098857 | membrane microdomain             | 0.000544419 | 5     | -1.341640786 |
| CC       | GO:0030426 | growth cone                      | 0.010929308 | 3     | -0.577350269 |
| CC       | GO:0097386 | glial cell projection            | 0.010929308 | 2     | -1.414213562 |
| CC       | GO:0030427 | site of polarized growth         | 0.010929308 | 3     | -0.577350269 |
| KEGG     | hsa04215   | Apoptosis - multiple species     | 3.65445E-05 | 4     | -1           |
| KEGG     | hsa04217   | Necroptosis                      | 3.65445E-05 | 6     | -2.449489743 |
| KEGG     | hsa05145   | Toxoplasmosis                    | 0.000114108 | 5     | -2.236067977 |
| KEGG     | hsa04068   | FoxO signaling pathway           | 0.00017832  | 5     | -2.236067977 |
| KEGG     | hsa04210   | Apoptosis                        | 0.00017832  | 5     | -1.341640786 |
| KEGG     | hsa05321   | Inflammatory bowel disease       | 0.000190727 | 4     | -2           |
| KEGG     | hsa01524   | Platinum drug resistance         | 0.000237581 | 4     | 0            |

Supplementary Table S7. GO/KEGG enrichment analysis for Hub genes of Ferroptosis- and Autophagy-related DEGs.

| ONTOLOGY | ID         | Description                                                                  | p.adjust    | Count | zscore       |
|----------|------------|------------------------------------------------------------------------------|-------------|-------|--------------|
| MF       | GO:0004857 | enzyme inhibitor activity                                                    | 0.000162684 | 6     | 0            |
| MF       | GO:0015631 | tubulin binding                                                              | 0.001488279 | 5     | -0.447213595 |
| MF       | GO:0005126 | cytokine receptor binding                                                    | 0.002961663 | 4     | -2           |
| MF       | GO:0008017 | microtubule binding                                                          | 0.002961663 | 4     | 0            |
| MF       | GO:0051087 | chaperone binding                                                            | 0.002961663 | 3     | -0.577350269 |
| MF       | GO:0019903 | protein phosphatase binding                                                  | 0.005940815 | 3     | -1.732050808 |
| MF       | GO:0004866 | endopeptidase inhibitor activity                                             | 0.007469973 | 3     | -0.577350269 |
| MF       | GO:0030414 | peptidase inhibitor activity                                                 | 0.007469973 | 3     | -0.577350269 |
| MF       | GO:0019902 | phosphatase binding                                                          | 0.007469973 | 3     | -1.732050808 |
| MF       | GO:0061135 | endopeptidase regulator activity                                             | 0.007469973 | 3     | -0.577350269 |
| MF       | GO:0004861 | cyclin-dependent protein serine/threonine kinase inhibitor activity          | 0.002468614 | 2     | 0            |
| MF       | GO:0043027 | cysteine-type endopeptidase inhibitor activity involved in apoptotic process | 0.00368153  | 2     | 0            |
| MF       | GO:0030291 | protein serine/threonine kinase inhibitor activity                           | 0.006503378 | 2     | 0            |
| MF       | GO:0043028 | cysteine-type endopeptidase regulator activity involved in apoptotic process | 0.007469973 | 2     | 0            |
| MF       | GO:0016538 | cyclin-dependent protein serine/threonine kinase regulator activity          | 0.008964342 | 2     | 0            |
